# Supplementary material for: Validation of Suitable Housekeeping Genes for the Normalization of mRNA Expression for Studying Tumor Acidosis
Source: PubMed Central journal article supplement (PMC6213411; doi:10.3390/ijms19102930), 2018-09-26
Supplement: ijms-19-02930-s001.pdf [file ijms-19-02930-s001.pdf]

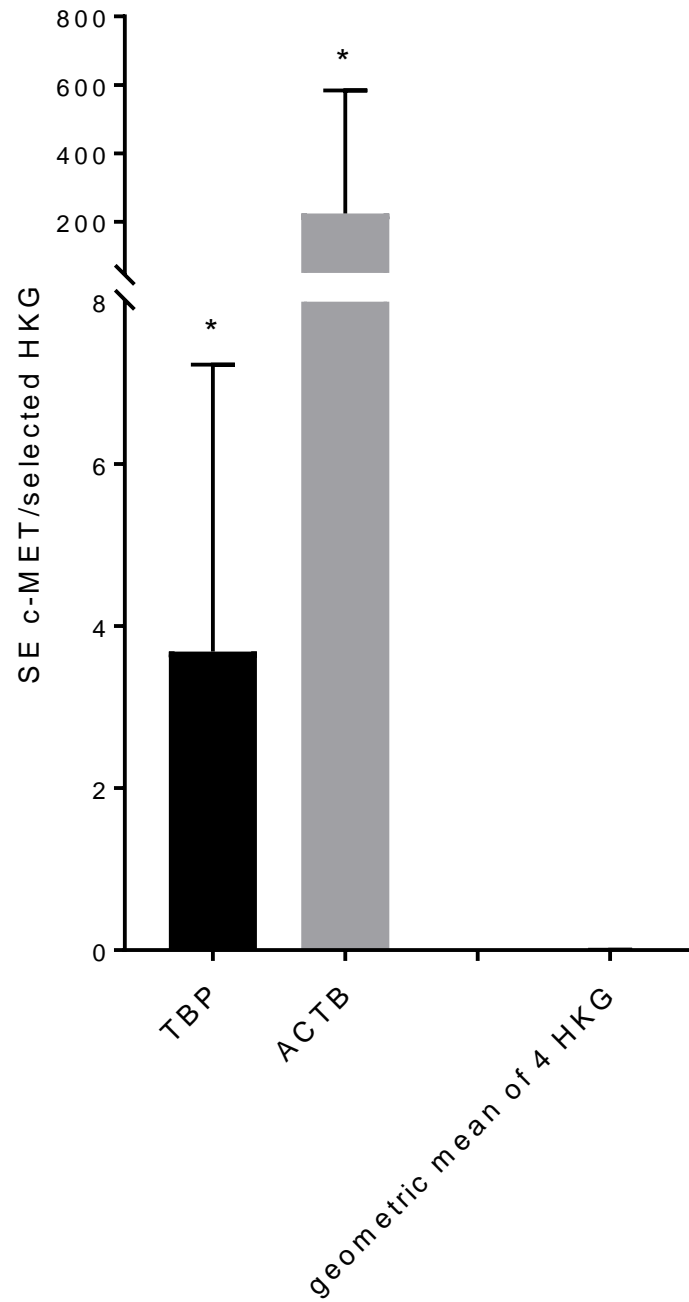

**Figure S1. The SE of the expression of *c-MET* at pH 6.5.** *c-MET* expression was normalised for *TBP* or *ACTB* or for the geometric average of *YWHAZ*, *GUSB*, *GAPDH* and *18S rRNA*.  $p < 0.05$  for both *ACTB* or *TBP* vs the geometric mean of the 4 selected HKG,  $n = 3$ .
